1 **RESEARCH LETTER**

2

3 **Risk factors for experiencing Long-COVID symptoms: Insights from two nationally representative surveys**

4

5 Yixuan Wu, BS,<sup>1,2</sup> Mitsuaki Sawano, MD, PhD,<sup>2,3</sup> Yilun Wu, BS,<sup>1,2</sup> Rishi M. Shah,<sup>2,4</sup> Pamela Bishop, PhD,<sup>2</sup>

6 Akiko Iwasaki, PhD,<sup>3,5,6</sup> Harlan M. Krumholz, MD, SM<sup>2,3,7,8</sup>

7

8 <sup>1</sup> Department of Biostatistics, Yale School of Public Health, New Haven, Connecticut

9 <sup>2</sup> Center for Outcomes Research and Evaluation, Yale New Haven Hospital, New Haven, Connecticut

10 <sup>3</sup> Center for Infection and Immunity, Yale School of Medicine, New Haven, Connecticut

11 <sup>4</sup> Department of Applied Mathematics, Yale College, New Haven, Connecticut

12 <sup>5</sup> Department of Immunobiology, Yale School of Medicine, New Haven, Connecticut

13 <sup>6</sup> Howard Hughes Medical Institute, Chevy Chase, Maryland

14 <sup>7</sup> Section of Cardiovascular Medicine, Department of Internal Medicine, Yale School of Medicine, New Haven,

15 Connecticut

16 <sup>8</sup> Department of Health Policy and Management, Yale School of Public Health, New Haven, Connecticut

17

18 **Corresponding author:**

19 Dr. Harlan M. Krumholz

20 195 Church Street, Fifth Floor

21 New Haven, CT 06510

22 Phone: 203-497-1246; Email: [harlan.krumholz@yale.edu](mailto:harlan.krumholz@yale.edu)

23

24 **Word Count:** 575

25 **Abstract**

26 Background: Long COVID (LC) is a complex and multisystemic condition marked by a diverse range of symptoms,  
27 yet its associated risk factors remain poorly defined.

28 Methods: Leveraging data from the 2022 Behavioral Risk Factor Surveillance System (BRFSS) and National Health  
29 Interview Survey (NHIS), both representative of the United States population, this study aimed to identify  
30 demographic characteristics associated with LC. The sample was restricted to individuals aged 18 years and older  
31 who reported a positive COVID-19 test or doctor's diagnosis. We performed a descriptive analysis comparing  
32 characteristics between participants with and without LC. Furthermore, we developed multivariate logistic  
33 regression models on demographic covariates that would have been valid at the time of the COVID-19 infection.

34 Results: Among the 124,313 individuals in BRFSS and 10,131 in the NHIS reporting either a positive test or  
35 doctor's diagnosis for COVID-19 (Table), 26,783 (21.5%) in BRFSS and 1,797 (17.1%) in NHIS reported LC.  
36 In the multivariate logistic regression model, we found middle age, female gender, Hispanic ethnicity, lack of a  
37 college degree, and residence in non-metropolitan areas associated with higher risk of LC. Notably, the initial  
38 severity of acute COVID-19 was strongly associated with LC risk. In contrast, significantly lower ORs were  
39 reported for Non-Hispanic Asian and Black Americans compared to Non-Hispanic White.

40 Conclusions: In the United States, there is marked variation in the risk of LC by demographic factors and initial  
41 infection severity. Further research is needed to understand the underlying cause of these observations.

42

## 43 **Introduction**

44 Long COVID (LC) is a multisystemic condition characterized by a diverse range of symptoms,<sup>1</sup> and the risk factors  
45 associated with LC are not well defined. The most recent versions of the Behavioral Risk Factor Surveillance  
46 System (BRFSS) survey and National Health Interview Survey (NHIS) have sampling and survey designs suitable to  
47 determine the patient demographic characteristics associated with LC.<sup>2</sup>

## 48 49 **Methods**

50 The study data are from the 2022 BRFSS and NHIS, which included individuals  $\geq 18$  years living in the United  
51 States. We restricted the sample to people who reported either a positive test or a doctor's diagnosis of COVID-19.  
52 An affirmative or negative response to this question defined LC or non-LC, respectively: "Did you have any  
53 symptoms lasting 3 months or longer that you did not have before having coronavirus or COVID-19?". The  
54 COVID-19 severity question is exclusive to the NHIS data, while other characteristics included in the study are  
55 consistent. We used chi-squared tests to compare characteristics between participants with and without LC. We  
56 developed multivariate logistic regression models on demographic covariates that would have been valid at the time  
57 of the COVID-19 infection (Table). We reported odds ratios (OR) to identify risk factors associated with LC. All  
58 analyses were performed using R, version 4.1.2 (R Foundation for Statistical Computing).

## 59 60 **Results**

61 Among the 124,313 individuals in BRFSS and 10,131 in the NHIS reporting either a positive test or doctor's  
62 diagnosis for COVID-19 (Table), 26,783 (21.5%) in BRFSS and 1,797 (17.1%) in NHIS reported LC. The  
63 sociodemographic characteristics of those reporting LC were largely consistent across both surveys (Table and  
64 Figure). Those with more severe acute COVID-19 presentations had the highest OR. In addition, older adults,  
65 females, people who identified as Hispanic, those without a college degree, and those living in non-metropolitan  
66 areas had higher risks of being affected by LC. Of note, the oldest adults (aged  $\geq 65$  years) had risks that were only  
67 slightly higher than those of the youngest adults (aged 18-24 years). Non-Hispanic Black and Asian people had  
68 lower risks than White people, with Asian people having the lowest risk.

## 69 70 **Discussion**

71 This study identified demographic characteristics associated with LC. We identified the initial severity of the  
72 infection as strongly associated with LC, which may point to prevention and early intervention with therapeutics as  
73 an important approach. The reason for the variation in the risks associated with demographic factors, such as sex,  
74 race and ethnicity, education, and geography, is unclear and could be related to exposures, treatments, and reporting.  
75 There is a need for further studies to illuminate the underlying mechanisms of these differences. Although this study  
76 is based on self-reported data, this is currently the only way to diagnose LC, and we restricted the sample to those  
77 who reported either a positive test or doctor's diagnosis for COVID-19. A strength of this study is the consistency in  
78 these national surveys. Other studies have reported female sex, older age, and previous hospitalization or ICU  
79 admission in association with higher risk for LC.<sup>3-5</sup> However, previous studies did not have the advantage of national  
80 representation from a single country that experienced a substantial pandemic toll. Limitations of our study include  
81 the lack of medical record information, though that information would be incomplete for many people. In  
82 conclusion, in the United States, there is marked variation in the risk of LC by demographic factors and initial  
83 infection severity. Further research is needed to understand the underlying cause of these observations.

84 **Conflict of interest statement:**

85 In the past three years, Harlan Krumholz received expenses and/or personal fees from Element Science, Eyedentify,  
86 and F-Prime. He is a co-founder of Hugo Health, Refactor Health, and Ensignt-AI. He is the co-editor of Journal  
87 Watch: Cardiology of the Massachusetts Medical Society and is a section editor of UpToDate. He is associated with  
88 contracts, through Yale New Haven Hospital, from the Centers for Medicare & Medicaid Services and through Yale  
89 University from Janssen, Johnson & Johnson Consumer, and Pfizer. Akiko Iwasaki co-founded RIGImmune,  
90 Xanadu Bio, and PanV, consults for Paratus Sciences and InvisiShield Technologies, and is a member of the Board  
91 of Directors of Roche Holding Ltd. The other authors have no potential conflicts of interest to report.

92

93 **Funding statement:**

94 This study was supported in part by funds from Fred Cohen and Carolyn Klebanoff.

95 **References**

- 96 1. Davis HE, McCorkell L, Vogel JM, Topol EJ. Long COVID: major findings, mechanisms and recommendations  
97 [published correction appears in *Nat Rev Microbiol.* 2023 Jun;21(6):408]. *Nat Rev Microbiol.* 2023;21(3):133-146.  
98 doi:10.1038/s41579-022-00846-2
- 99 2. Adjaye-Gbewonyo D, Vahratian A, Perrine CG, Bertolli J. Long COVID in Adults: United States, 2022. *NCHS*  
100 *Data Brief.* Sep 2023;(480):1-8.
- 101 3. Tsampasian V, Elghazaly H, Chattopadhyay R, et al. Risk factors associated with post-COVID-19 condition: a  
102 systematic review and meta-analysis. *JAMA Intern Med.* 2023;183(6):566–580.  
103 doi:10.1001/jamainternmed.2023.0750
- 104 4. Bai F, Tomasoni D, Falcinella C, et al. Female gender is associated with long COVID syndrome: a prospective  
105 cohort study. *Clin Microbiol Infect.* 2022;28(4):611.e9-611.e16. doi:10.1016/j.cmi.2021.11.002
- 106 5. Sudre CH, Murray B, Varsavsky T, et al. Attributes and predictors of long COVID [published correction appears  
107 in *Nat Med.* 2021 Jun;27(6):1116]. *Nat Med.* 2021;27(4):626-631. doi:10.1038/s41591-021-01292-y

Table. Sociodemographic characteristics of patients with and without Long Covid symptoms in the BRFSS and NHIS

|                                  | BRFSS                       |                     |                           | p-value | NHIS                        |                     |                           | p-value |
|----------------------------------|-----------------------------|---------------------|---------------------------|---------|-----------------------------|---------------------|---------------------------|---------|
|                                  | Total <sup>a</sup><br>n (%) | Long COVID<br>n (%) | No Long<br>COVID<br>n (%) |         | Total <sup>a</sup><br>n (%) | Long COVID<br>n (%) | No Long<br>COVID<br>n (%) |         |
|                                  | 124313 (100)                | 26783 (21.5)        | 94596 (76.1)              |         | 10131 (100)                 | 1797 (17.7)         | 7149 (70.6)               |         |
| Sex                              |                             |                     |                           | < .001  |                             |                     |                           | < .001  |
| Female                           | 67409                       | 9637 (14.3)         | 48500 (71.9)              |         | 5646                        | 1159 (20.5)         | 3879 (68.7)               |         |
| Male                             | 56904                       | 17146 (30.1)        | 46096 (81.0)              |         | 4483                        | 637 (14.2)          | 3269 (72.9)               |         |
| Age groups, years                |                             |                     |                           | < .001  |                             |                     |                           | < .001  |
| 18-24                            | 9755                        | 1762 (18.1)         | 7872 (80.7)               |         | 971                         | 136 (14.0)          | 712 (73.3)                |         |
| 25-34                            | 17540                       | 3666 (20.9)         | 13572 (77.4)              |         | 1958                        | 314 (16.0)          | 1497 (76.4)               |         |
| 35-44                            | 20911                       | 4856 (23.2)         | 15592 (74.6)              |         | 1914                        | 363 (19.0)          | 1383 (72.3)               |         |
| 45-54                            | 21687                       | 5301 (24.4)         | 15836 (73.0)              |         | 1561                        | 306 (19.6)          | 1101 (70.5)               |         |
| 55-64                            | 22784                       | 5250 (23.0)         | 16910 (74.2)              |         | 1669                        | 331 (19.8)          | 1114 (66.7)               |         |
| ≥ 65                             | 31636                       | 5948 (18.8)         | 24814 (78.4)              |         | 2043                        | 344 (16.8)          | 1331 (65.1)               |         |
| Race and ethnicity               |                             |                     |                           | < .001  |                             |                     |                           | < .001  |
| AIAN, NH                         | 2310                        | 691 (29.9)          | 1573 (68.1)               |         | 97                          | 19 (19.6)           | 54 (55.7)                 |         |
| Asian, NH                        | 3293                        | 395 (12.0)          | 2827 (85.8)               |         | 530                         | 44 (8.3)            | 407 (76.8)                |         |
| Black or African<br>American, NH | 9061                        | 1761(19.4)          | 7155 (79.0)               |         | 1015                        | 162 (16.0)          | 663 (65.3)                |         |
| Hispanic or Latino               | 14203                       | 3271 (23.0)         | 10732 (75.6)              |         | 1731                        | 321 (18.5)          | 1187 (68.6)               |         |
| Other races, NH                  | 3688                        | 908 (24.6)          | 2690 (72.9)               |         | 195                         | 42 (21.5)           | 135 (69.2)                |         |
| White, NH                        | 91758                       | 19757 (21.5)        | 69619 (75.9)              |         | 6563                        | 1209 (18.4)         | 4703 (71.7)               |         |
| Socioeconomic factors            |                             |                     |                           |         |                             |                     |                           |         |

|                               |        |              |              |        |      |             |             |        |
|-------------------------------|--------|--------------|--------------|--------|------|-------------|-------------|--------|
| Employed                      | 76807  | 16184 (21.1) | 58953 (76.8) | < .001 | 6707 | 1152 (17.2) | 4899 (73.0) | < .001 |
| Has Health insurance coverage | 114598 | 24423 (21.3) | 87448 (76.3) | < .001 | 9370 | 1658 (17.7) | 6618 (70.6) | 0.53   |
| Educational attainment        |        |              |              | < .001 |      |             |             | < .001 |
| Some college or below         | 69823  | 16709 (23.9) | 51547 (73.8) |        | 6044 | 1175 (19.4) | 4069 (67.3) |        |
| College (4 years) and above   | 54490  | 10074 (18.5) | 43049 (79.0) |        | 4046 | 614 (15.2)  | 3055 (75.5) |        |
| Urbanization level            |        |              |              | < .001 |      |             |             | 0.001  |
| Metropolitan                  | 32505  | 7862 (24.2)  | 23824 (73.2) |        | 8599 | 1481 (17.2) | 6112 (71.1) |        |
| Non-metropolitan              | 88756  | 18436 (20.8) | 68242 (76.9) |        | 1532 | 316 (20.6)  | 1037 (67.7) |        |
| Covid severity                |        |              |              |        |      |             |             | < .001 |
| Mild symptoms                 | NA     | NA           | NA           |        | 3843 | 389 (10.1)  | 3435 (89.4) |        |
| Moderate symptoms             | NA     | NA           | NA           |        | 3662 | 759 (20.7)  | 2862 (78.2) |        |
| Severe symptoms               | NA     | NA           | NA           |        | 1508 | 648 (43.0)  | 845 (56.0)  |        |

110 Abbreviations: AIAN, American Indian and Alaska Native; NH, non-Hispanic; BRFSS, Behavioral Risk Factor Surveillance System; NHIS, National Health  
111 Interview Survey; NA, Not applicable

112 <sup>a</sup> The total number represents those who reported either a positive test or a doctor's diagnosis of COVID-19. Individuals with uncertain or missing response to the  
113 LC identifier question (1185, 11.7% for NHIS, 2934, 2.4% for BRFSS) were excluded for the logistic analysis.



114 **Figure Title:**

115 Figure. Risk factors and associations with Long-COVID symptoms in patients.

116

117 **Figure Legend:**

118 Risk factors described by ORs (95% CI) of multivariate logistic regression for the NHIS data set (A) and BRFSS  
119 data set (B). Black dots represent the reference category for each variable. Individuals who had more severe covid  
120 symptoms had a significantly higher risk of experiencing LC symptoms. Abbreviations: AIAN, American Indian  
121 and Alaska Native; NH, non-Hispanic; BRFSS, Behavioral Risk Factor Surveillance System; NHIS, National Health  
122 Interview Survey

**A** BRFSS 2022 Data Set

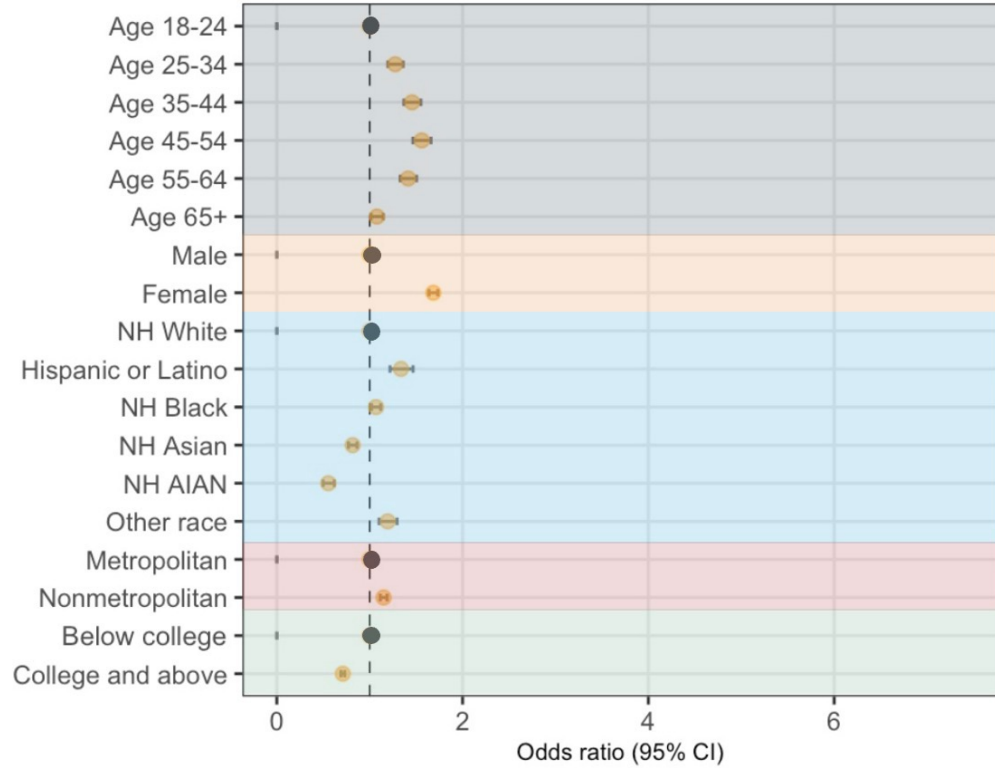

**B** NHIS 2022 Data Set

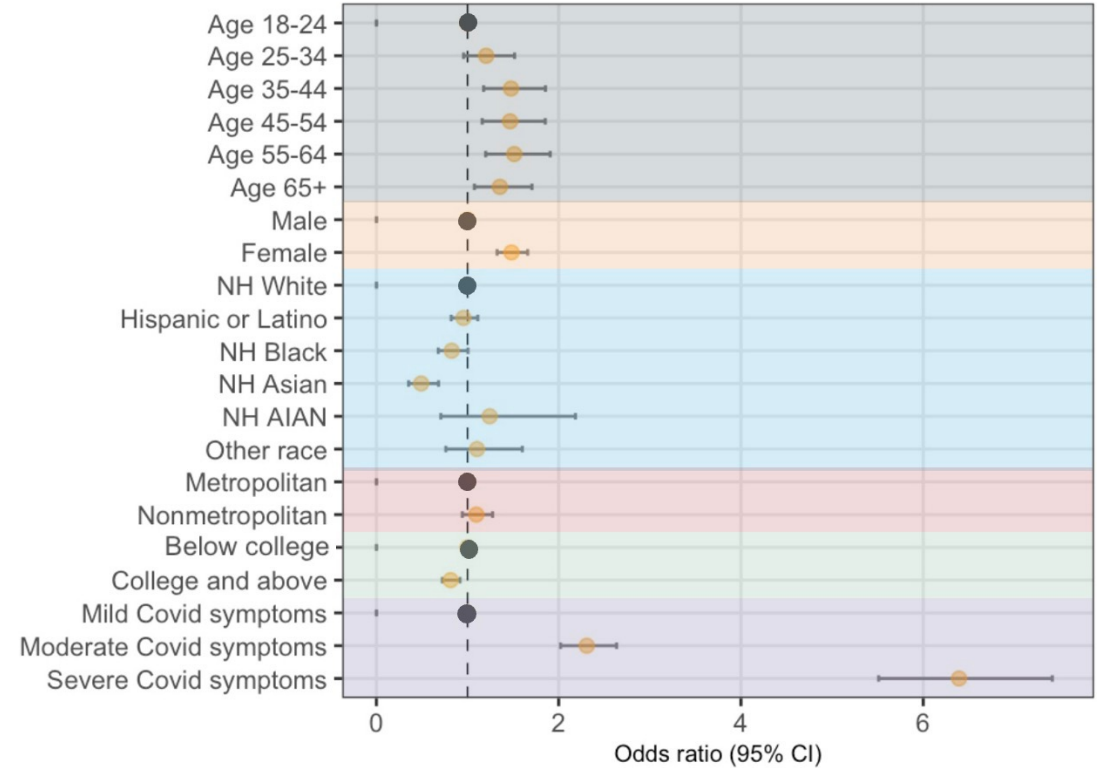

Source: https://medrxiv.org/content/10.1101/2024.01.12.24301170v1.full.pdf
